# Supplementary material for: Gait characteristics associated with the foot and ankle in inflammatory arthritis: a systematic review and meta-analysis
Source: Springer Nature journal article supplement (doi:10.1186/s12891-015-0596-0), 2015-06-04
Supplement: MOESM1 [file 9752410]

## Gait characteristics associated with the foot and ankle in inflammatory arthritis: a systematic review and meta-analysis

Matthew Carroll, Priya Parmar, Nicola Dalbeth, Mark Boocock, Keith Rome

### Additional 1. Description of search strategy.

Database-specific subject terms and truncated keywords were sorted into two distinct concepts: (a) gait analysis and (b) inflammatory rheumatic disease. Within each concept, subject terms were searched individually while keywords were combined with the term ‘OR’ into a single search. Subject terms and keywords within each concept were then combined with the term ‘OR’ to remove duplicates. Following this, the final search results for the two concepts will be combined together with the term ‘AND’ to form the total yield. This technique was applied to Medline (Additional Table 1) and CINAHL. SportDiscus and the Cochrane Library were searched by use of keywords only, as subject term functions are not available in these databases. Targeted searching of relevant journals also occurred following bibliographic review of retrieved articles.

### Additional Table 1. Search strategy

|          |          |                        |                                                                                                                                                                   |
|----------|----------|------------------------|-------------------------------------------------------------------------------------------------------------------------------------------------------------------|
| <b>a</b> | 1        | Subject term           | exp. Gait analysis                                                                                                                                                |
|          | 2        | Keywords               | Lower extremi* [or] Lower limb* [or] Foot [or] Feet [or] Ankle* [or] Leg* [or] Rear foot [or] Hind foot [or] Knee [or] Hip                                        |
|          | 3        | Keywords               | Kinematic* [or] Kinetic* [or] Spatial [or] Temporal [or] Spatio-temporal [or] electromy* [or] EMG [or] plantar pressure [or] pressure [or] force [or] pedobarogr* |
|          | 4        | Combine                | 2 [and] 3                                                                                                                                                         |
|          | 5        | Combine                | 1 [or] 4                                                                                                                                                          |
| <b>b</b> | 6        | Subject term           | exp. Rheumatic disease                                                                                                                                            |
|          | 7        | Subject term           | exp. Rheumatoid arthritis                                                                                                                                         |
|          | 8        | Subject term           | exp. Gout                                                                                                                                                         |
|          | 9        | Subject term           | exp. Systemic sclerosis                                                                                                                                           |
|          | 10       | Subject term           | exp. Polymyalgia rheumatica                                                                                                                                       |
|          | 11       | Subject term           | exp. Psoriatic arthritis                                                                                                                                          |
|          | 12       | Subject term           | exp. Lupus erythematosus                                                                                                                                          |
|          | 13       | Subject term           | exp. Ankylosing spondylitis                                                                                                                                       |
| 14       | Keywords | Rheumat* [or] Spondyl* |                                                                                                                                                                   |
| <b>c</b> | 15       | Combine                | 6 [or] 7 [or] 8 [or] 9 [or] 10 [or] 11 [or] 12 [or] 13 [or] 14                                                                                                    |
|          | 16       | Combine                | 5 [and] 15                                                                                                                                                        |

(a) Search terms for gait analysis (b) search terms for inflammatory rheumatic disease (c) combination of search terms
