# Supplementary material for: Gait characteristics associated with the foot and ankle in inflammatory arthritis: a systematic review and meta-analysis
Source: Springer Nature journal article supplement (doi:10.1186/s12891-015-0596-0), 2015-06-04
Supplement: MOESM2 [file 9752410]

## Gait characteristics associated with the foot and ankle in inflammatory arthritis: a systematic review and meta-analysis

Matthew Carroll, Priya Parmar, Nicola Dalbeth, Mark Boocock, Keith Rome

### Additional File 2. Studies excluded from inclusion and meta-analysis

| Publication         | Grounds for exclusion inclusion in review | Grounds for exclusion from meta-analysis |
|---------------------|-------------------------------------------|------------------------------------------|
| Hyslop [1]          | Reliability study                         |                                          |
| Sahin [2]           | No specific gait parameters reported      |                                          |
| Sakauchi [3]        | No specific gait parameters reported      |                                          |
| Sharma [4]          | No specific gait parameters reported      |                                          |
| Collis [5]          | No specific gait parameters reported      |                                          |
| Esbjörnsson [6]     | Dimensionless measurement units           |                                          |
| Barn [7]            | Reliability study                         |                                          |
| Siddle [8]          | No healthy control group                  |                                          |
| Sawacha [9]         | No healthy control group                  |                                          |
| Dubbeldam [10]      | No healthy control group                  |                                          |
| van der Leeden [11] | No healthy control group                  |                                          |
| Rome [12]           | Reliability study                         |                                          |
| Hamilton [13]       | No healthy control group                  |                                          |
| Fransen [14]        | Reliability study                         |                                          |
| Keenan [15]         | No healthy control group                  |                                          |
| Platto [16]         | No healthy control group                  |                                          |
| Marshall [17]       | Control group no clear                    |                                          |
| Kettelkamp [18]     | No healthy control group                  |                                          |
| Brinkmann [19]      | Intervention                              |                                          |
| Novak [20]          | Intervention                              |                                          |
| Garling [21]        | Intervention                              |                                          |
| Weiss [22]          | Intervention                              |                                          |
| Mejjad [23]         | Intervention                              |                                          |
| Valkeinen [24]      | Intervention                              |                                          |
| Woodburn [25]       | Intervention                              |                                          |
| Moffet [26]         | Intervention                              |                                          |
| Meyers [27]         | Intervention                              |                                          |
| Fransen [28]        | Intervention                              |                                          |
| Locke [29]          | Intervention                              |                                          |
| Tastekin [30]       | Non-English                               |                                          |
| Miu [31]            | Non-English                               |                                          |
| Doorn [32]          | Reliability study                         |                                          |
| Brenton-Rule [33]   | Reliability study                         |                                          |
| Vidmar [34]         | Reliability study                         |                                          |
| Firth [35]          | Reliability study                         |                                          |
| Eastlack [36]       | Reliability study                         |                                          |
| Barrett [37]        | Reliability study                         |                                          |
| Woodburn [38]       |                                           | No standard deviation value provided     |
| O'Connell [39]      |                                           | No standard deviation value provided     |
| Simkin [40]         |                                           | No standard deviation value provided     |
| Stauffer [41]       |                                           | No standard deviation value provided     |
| Woodburn [42]       |                                           | No standard deviation value provided     |
| Turner [43]         |                                           | No standard deviation value provided     |
| Tuna [44]           |                                           | Peak values reported not mean values     |
| Woodburn [45]       |                                           | No standard deviation value provided     |

## **Additional File 2. Reference list**

1. Hyslop E, Woodburn J, McInnes I, Semple R, Newcombe L, Hendry G, et al. A reliability study of biomechanical foot function in psoriatic arthritis based on a novel multi-segmented foot model. *Gait Posture* 2010;**32**:619-26.
2. Sahin N, Ozcan E, Baskent A, Karan A, Kasikcioglu E. Muscular kinetics and fatigue evaluation of knee using by isokinetic dynamometer in patients with ankylosing spondylitis. *Acta Reumatol Port* 2011;**36**:252-9.
3. Sakauchi M, Narushima K, Sone H, Kamimaki Y, Yamazaki Y, Kato S, et al. Kinematic approach to gait analysis in patients with rheumatoid arthritis involving the knee joint. *Arthritis Care Res* 2001;**45**:35-41.
4. Sharma M, Dhanendran M, Hutton WC, Corbett M. Changes in load bearing in the rheumatoid foot. *Ann Rheum Dis* 1979;**38**:549-52.
5. Collis W, Jayson M. Measurement of pedal pressures. An illustration of a method. *Ann Rheum Dis* 1972;**31**:215.
6. Broström EW, Esbjörnsson A-C, von Heideken J, Iversen MD. Gait deviations in individuals with inflammatory joint diseases and osteoarthritis and the usage of three-dimensional gait analysis. *Best Pract Res Clin Rheumatol*. 2012;**26**:409-22
7. Barn R, Rafferty D, Turner D, Woodburn J. Reliability study of tibialis posterior and selected leg muscle EMG and multi-segment foot kinematics in rheumatoid arthritis associated pes planovalgus. *Gait Posture* 2012;**36**:567-571.
8. Siddle HJ, Firth J, Waxman R, Nelson EA, Helliwell PS. A case series to describe the clinical characteristics of foot ulceration in patients with rheumatoid arthritis. *Clin Rheumatol* 2012;**31**:541-5.
9. Sawacha Z, Carraro E, Del Din S, Guiotto A, Bonaldo L, Punzi L, et al. Biomechanical assessment of balance and posture in subjects with ankylosing spondylitis. *J Neuroeng Rehabil* 2012;**9**:1-11.
10. Dubbeldam R, Baan H, Nene AV, Drossaers-Bakker KW, van de Laar MAFJ, Hermens HJ, et al. Foot and ankle kinematics in rheumatoid arthritis: The influence off foot and ankle joint and leg tendon pathologies. *Arthritis Care Res* 2012;**65**:503-511.
11. van der Leeden M, Steultjens M, Dekker JHM, Prins APA, Dekker J. Forefoot joint damage, pain and disability in rheumatoid arthritis patients with foot complaints: the role of plantar pressure and gait characteristics. *Rheumatology* 2006;**45**:465-9.
12. Rome K, Hanchard NCA. Within-day reliability of temporal-spatial gait parameters associated with rheumatoid arthritic feet. *Musculoskeletal Care* 2005;**3**:17-23.
13. Hamilton J, Brydson G, Fraser S, Grant M. Walking ability as a measure of treatment effect in early rheumatoid arthritis. *Clin Rehabil* 2001;**15**:142-7.
14. Fransen M, Edmonds J. Gait variables: appropriate objective outcome measures in rheumatoid arthritis. *Rheumatology (Oxford)* 1999;**38**:663-7.
15. Keenan M, Peabody T, Gronley J, Perry J. Valgus deformities of the feet and characteristics of gait in patients who have rheumatoid arthritis. *J Bone Joint Surg Am* 1991;**73**:237-47.
16. Platto MJ, O'Connell PG, Hicks JE, Gerber LH. The relationship of pain and deformity of the rheumatoid foot to gait and an index of functional ambulation. *J Rheumatol*. 1991;**18**:38-43.
17. Marshall RN, Myers DB, Palmer DG. Disturbance of gait due to rheumatoid disease. *J Rheumatol* 1980;**7**:617-23.
18. Kettelkamp D, Leaverton P, Misol S. Gait characteristics of the rheumatoid knee. *Arch Surg* 1972;**104**:30.
19. Brinkmann JR, Perry J. Rate and range of knee motion during ambulation in healthy and arthritic subjects. *Phys Ther* 1985;**65**:1055-60.
20. Novak P, Burger H, Tomsic M, Marincek C, Vidmar G. Influence of foot orthoses on plantar pressures, foot pain and walking ability of rheumatoid arthritis patients - a randomised controlled study. *Disabil Rehabil* 2009;**31**:638-45.

21. Garling E, Wolterbeek N, Velzeboer S, Nelissen R, Valstar E, Doorenbosch C, et al. Co-contraction in RA patients with a mobile bearing total knee prosthesis during a step-up task. *Knee Surg Sports Traumatol Arthrosc* 2008;**16**:734-40.
22. Weiss RJ, Broström E, Stark A, Wick MC, Wretenberg P. Ankle/hindfoot arthrodesis in rheumatoid arthritis improves kinematics and kinetics of the knee and hip: a prospective gait analysis study. *Rheumatology* 2007;**46**:1024-8.
23. Mejjad O, Vittecoq O, Pouplin S, Grassin-Delyle L, Weber J, Le Loet X. Foot orthotics decrease pain but do not improve gait in rheumatoid arthritis patients. *Joint Bone Spine* 2004;**71**:542-5.
24. Valkeinen H, Alen M, Hannonen P, Häkkinen A, Airaksinen O, Häkkinen K. Changes in knee extension and flexion force, EMG and functional capacity during strength training in older females with fibromyalgia and healthy controls. *Rheumatology (Oxford)* 2004;**43**:225-8.
25. Woodburn J, Helliwell PS, Barker S. Changes in 3D joint kinematics support the continuous use of orthoses in the management of painful rearfoot deformity in rheumatoid arthritis. *J Rheumatol* 2003;**30**:2356-64.
26. Moffet H, Noreau L, Parent E, Drolet M. Feasibility of an eight-week dance-based exercise program and its effects on locomotor ability of persons with functional class III rheumatoid arthritis. *Arthritis Care Res* 2000;**13**:100-11.
27. Meyers LL, Dobson SR, Wiegand D, Webb JD, Mencia GA. Mechanical instability as a cause of gait disturbance in high-grade spondylolisthesis: a pre- and postoperative three-dimensional gait analysis. *J Pediatr Orthop* 1999;**19**:672-6.
28. Fransen M, Edmonds J. Off-the-shelf orthopedic footwear for people with rheumatoid arthritis. *Arthritis Care Res.* 1997;10(4):250-6.
29. Locke M, Perry J, Campbell J, Thomas L. Ankle and Subtalar Motion During Gait in Arthritic Patients. *Phys Ther* 1984;**64**:504-9.
30. Tastekin N, Tuna H, Birtane M, Uzunca K. Plantar pressure changes of patients with heel valgus in rheumatoid arthritis. *Turk J Rheumatol* 2009;**24**:67-71.
31. Miu S, Ancuța C, Belibou I, Macovei L, Chirieac R. [Disability assessment tools in psoriatic arthritis: VICON gait]. *Rev Med Chir Soc Med Nat Iasi* 2012;**116**:50-5.
32. Doorn PF, Keijsers NLW, van Limbeek J, Anderson PG, Laan RFJM, Bosch PVtP, et al. A clinical classification system for rheumatoid forefoot deformity. *Foot Ankle Surg* 2011;**17**:158-65.
33. Brenton-Rule A, Mattock J, Carroll M, Dalbeth N, Bassett S, Menz HB, et al. Reliability of the TekScan MatScan® system for the measurement of postural stability in older people with rheumatoid arthritis. *J Foot Ankle Res* 2012;**5**:1-7.
34. Vidmar G, Novak P. Reliability of in-shoe plantar pressure measurements in rheumatoid arthritis patients. *Int J Rehabil Res* 2009;**32**:36-40.
35. Firth J, Turner DE, Smith W, Helliwell PS, Woodburn J. Reliability of Pressurestat™ for measuring plantar foot pressures in patients with rheumatoid arthritis. *Clin Biomechanics* 2008;**23**:670-1.
36. Eastlack ME, Arvidson J, Snyder-Mackler L, Danoff JV, McGarvey CL. Interrater reliability of videotaped observational gait-analysis assessments. *Phys Ther* 1991;**71**:465-72.
37. Barrett JP, Jr. Plantar pressure measurements. Rational shoe-wear in patients with rheumatoid arthritis. *JAMA* 1976;**235**:1138-9.
38. Woodburn J, Nelson K, Siegel K, Kepple T, Gerber L. Multisegment foot motion during gait: proof of concept in rheumatoid arthritis. *J Rheumatol* 2004;**31**:1918-27.
39. O'Connell PG, Lohmann Siegel K, Kepple TM, Stanhope SJ, Gerber LH. Forefoot deformity, pain, and mobility in rheumatoid and nonarthritic subjects. *J Rheumatol* 1998;**25**:1681-6.
40. Simkin A. The dynamic vertical force distribution during level walking under normal and rheumatic feet. *Rheumatol Rehabil* 1981;**20**:88-97.

41. Stauffer RN, Chao EY, Györy AN. Biomechanical gait analysis of the diseased knee joint. *Clin Orthop Relat Res.* 1977(126):246-55.
42. Woodburn J, Turner D, Helliwell P, Barker S. A preliminary study determining the feasibility of electromagnetic tracking for kinematics at the ankle joint complex. *Rheumatology (Oxford)* 1999;**38**:1260-8.
43. Turner DE, Helliwell PS, Siegel KL, Woodburn J. Biomechanics of the foot in rheumatoid arthritis: Identifying abnormal function and the factors associated with localised disease 'impact'. *Clin Biomech* 2008;**23**:93-100.
44. Tuna H, Birtane M, Taştekin N, Kokino S. Pedobarography and its relation to radiologic erosion scores in rheumatoid arthritis. *Rheumatol Int* 2005;**26**:42-7.
45. Woodburn J, Helliwell PS. Relation between heel position and the distribution of forefoot plantar pressures and skin callosities in rheumatoid arthritis. *Ann Rheum Dis* 1996;**55**:806-10.
