# Supplementary material for: Gait characteristics associated with the foot and ankle in inflammatory arthritis: a systematic review and meta-analysis
Source: Springer Nature journal article supplement (doi:10.1186/s12891-015-0596-0), 2015-06-04
Supplement: MOESM3 [file 9752410]

## Gait characteristics associated with the foot and ankle in inflammatory arthritis: a systematic review and meta-analysis

Matthew Carroll, Priya Parmar, Nicola Dalbeth, Mark Boocock, Keith Rome

### Additional File 3: Spatiotemporal gait parameters measured and methods of data acquisition

| Author & reference | IA   | Data acquisition method | Parameters measured                                                                                                                        |
|--------------------|------|-------------------------|--------------------------------------------------------------------------------------------------------------------------------------------|
| Dubbeldam (1)      | RA   | 3D gait analysis        | Walking velocity, cadence, stride time, double stance percentage, stride length, stride width, step length                                 |
| Rome (2)           | RA   | Electronic Walkway      | Walking velocity, cadence, gait cycle time, single support time, double limb support time, base of support                                 |
| Eppeland (3)       | RA   | Electronic Walkway      | Walking velocity, cadence, step length, stance phase duration, step width                                                                  |
| Turner (4)         | RA   | Electronic Walkway      | Walking velocity, double support time                                                                                                      |
| Turner (5)         | RA   | Electronic Walkway      | Walking velocity, double support time                                                                                                      |
| Weiss (6)          | RA   | 3D gait analysis        | Walking velocity, cadence, stride length, step length, single support, double support                                                      |
| Turner (7)         | RA   | Electronic Walkway      | Walking velocity, double support percentage                                                                                                |
| Turner (8)         | RA   | Electronic Walkway      | Walking velocity, cadence, gait cycle time, stride length, double support time                                                             |
| Laroche (9)        | RA   | 3D gait analysis        | Walking velocity, stride length, walking frequency, stance phase duration, double stance phase duration                                    |
| Khazzam (10)       | RA   | 3D gait analysis        | Walking velocity, stride length, cadence, stance duration                                                                                  |
| Semple (11)        | RA   | Electronic Walkway      | Walking velocity                                                                                                                           |
| Laroche (12)       | RA   | 3D gait analysis        | Walking velocity, walking frequency, stride length, stance duration, double support phase duration                                         |
| Woodburn (13)      | RA   | 3D gait analysis        | Walking velocity                                                                                                                           |
| O'Connell (14)     | RA   | Electronic Walkway      | Walking velocity, cadence, stride length                                                                                                   |
| Fransen (15)       | RA   | Electronic Walkway      | Walking velocity, stride length, percentage double support time, stance phase percentage                                                   |
| Zebouni (16)       | AS   | Electronic Walkway      | Contact time, stride length & stride frequency                                                                                             |
| Isacson (17)       | RA   | Electronic Walkway      | Walking velocity, stride length, duration of gait cycle                                                                                    |
| Minns (18)         | RA   | Force sandals           | Walking velocity, cadence, stride length, stride width                                                                                     |
| Simkin (19)        | RA   | Force plate             | Walking velocity, stride frequency, stride length, stance time, swing time, double support period                                          |
| Stauffer (20)      | RA   | Electronic Walkway      | Walking velocity, cadence, stance phase percentage                                                                                         |
| Del Din (21)       | AS   | 3D gait analysis        | Walking velocity, stride period, stride length, stance period                                                                              |
| Mangone (22)       | AS   | 3D gait analysis        | Walking velocity, cadence, stride length                                                                                                   |
| Woodburn (23)      | PsA  | Electronic Walkway      | Walking velocity                                                                                                                           |
| Rome (24)          | Gout | Electronic Walkway      | Walking velocity, cadence, step length, stride length, single leg support, double leg support, stance phase duration, swing phase duration |

IA = inflammatory arthritis, RA = rheumatoid arthritis, AS = Ankylosing spondylitis, PsA = psoriatic arthritis.

### Additional File 3: Reference List

---

1. Dubbeldam R, Nene AV, Buurke JH, Groothuis-Oudshoorn CGM, Baan H, Drossaers-Bakker KW, et al. Foot and ankle joint kinematics in rheumatoid arthritis cannot only be explained by alteration in walking speed. *Gait Posture*. 2011;33(3):390-5.
2. Rome K, Dixon J, Gray M, Woodley R. Evaluation of static and dynamic postural stability in established rheumatoid arthritis: exploratory study. *Clin Biomech*. 2009;24(6):524-6.
3. Eppeland S, Myklebust G, Hodt-Billington C, Moe-Nilssen R. Gait patterns in subjects with rheumatoid arthritis cannot be explained by reduced speed alone. *Gait Posture*. 2009;29(3):499-503.
4. Turner D, Woodburn J. Characterising the clinical and biomechanical features of severely deformed feet in rheumatoid arthritis. *Gait Posture*. 2008;28(4):574-80.
5. Turner DE, Helliwell PS, Siegel KL, Woodburn J. Biomechanics of the foot in rheumatoid arthritis: Identifying abnormal function and the factors associated with localised disease 'impact'. *Clin Biomech*. 2008;23(1):93-100.
6. Weiss RJ, Wretenberg P, Stark A, Palmblad K, Larsson P, Gröndal L, et al. Gait pattern in rheumatoid arthritis. *Gait Posture*. 2008;28(2):229-34.
7. Turner DE, Helliwell PS, Emery P, Woodburn J. The impact of rheumatoid arthritis on foot function in the early stages of disease: a clinical case series. *BMC Musculoskelet Disord*. 2006;7:102-8.
8. Turner D, Woodburn J, Helliwell P, Cornwall M, Emery P. Pes planovalgus in RA: a descriptive and analytical study of foot function determined by gait analysis. *Musculoskeletal Care*. 2003;1(1):21-33.
9. Laroche D, Ornetti P, Thomas E, Ballay Y, Maillefert JF, Pozzo T. Kinematic adaptation of locomotor pattern in rheumatoid arthritis patients with forefoot impairment. *Exp Brain Res*. 2007;176(1):85-97.
10. Khazzam M, Long JT, Marks RM, Harris GF. Kinematic changes of the foot and ankle in patients with systemic rheumatoid arthritis and forefoot deformity. *J Orthop Res*. 2007;25(3):319-29.
11. Semple R, Turner DE, Helliwell PS, Woodburn J. Regionalised centre of pressure analysis in patients with rheumatoid arthritis. *Clin Biomech*. 2007;22(1):127-9.
12. Laroche D, Pozzo T, Ornetti P, Tavernier C, Maillefert JF. Effects of loss of metatarsophalangeal joint mobility on gait in rheumatoid arthritis patients. *Rheumatology (Oxford)*. 2006;45(4):435-40.
13. Woodburn J, Nelson K, Siegel K, Kepple T, Gerber L. Multisegment foot motion during gait: proof of concept in rheumatoid arthritis. *J Rheumatol*. 2004;31(10):1918-27.
14. O'Connell PG, Lohmann Siegel K, Kepple TM, Stanhope SJ, Gerber LH. Forefoot deformity, pain, and mobility in rheumatoid and nonarthritic subjects. *J Rheumatol*. 1998;25(9):1681-6.
15. Fransen M, Heussler J, Margiotta E, Edmonds J. Quantitative gait analysis -- comparison of rheumatoid arthritic and non-arthritic subjects. *Aust J Physiother*. 1994;40(3):191-9.
16. Zebouni L, Helliwell P, Howe A, Wright V. Gait analysis in ankylosing spondylitis. *Ann Rheum Dis*. 1992;51(7):898-9.
17. Isacson J, Broström LA. Gait in rheumatoid arthritis: an electrogoniometric investigation. *J Biomech*. 1988;21(6):451-7.
18. Minns R, Craxford AD. Pressure Under the Forefoot in Rheumatoid Arthritis A Comparison of Static and Dynamic Methods of Assessment. *Clin Orthop Relat Res*. 1984;187:235.
19. Simkin A. The dynamic vertical force distribution during level walking under normal and rheumatic feet. *Rheumatol Rehabil*. 1981;20(2):88-97.
20. Stauffer RN, Chao EY, Györy AN. Biomechanical gait analysis of the diseased knee joint. *Clin Orthop Relat Res*. 1977(126):246-55.
21. Del Din S, Carraro E, Sawacha Z, Guiotto A, Bonaldo L, Masiero S, et al. Impaired gait in ankylosing spondylitis. *Med Biol Eng Comput*. 2011;49(7):801-9.
22. Mangone M, Scettri P, Paoloni M, Procaccianti R, Spadaro A, Santilli V. Pelvis-shoulder coordination during level walking in patients with ankylosing spondylitis. *Gait Posture*. 2011;34(1):1-5.
23. Woodburn J, Hyslop E, Barn R, McInnes I, Turner D. Achilles tendon biomechanics in psoriatic arthritis patients with ultrasound proven enthesitis. *Scand J Rheumatol*. 2013(00):1-4.
24. Rome K, Survepalli D, Sanders A, Lobo M, McQueen FM, McNair P, et al. Functional and biomechanical characteristics of foot disease in chronic gout: a case-control study. *Clin Biomech*. 2011;26(1):90-4.
