# Supplementary material for: Gait characteristics associated with the foot and ankle in inflammatory arthritis: a systematic review and meta-analysis
Source: Springer Nature journal article supplement (doi:10.1186/s12891-015-0596-0), 2015-06-04
Supplement: MOESM4 [file 9752410]

## Gait characteristics associated with the foot and ankle in inflammatory arthritis: a systematic review and meta-analysis

Matthew Carroll, Priya Parmar, Nicola Dalbeth, Mark Boocock, Keith Rome

### Additional File 4: Kinematic gait parameters measured and methods of data acquisition

| Author         | IA | Parameters measured                                                                                                                                                                                                                                                                       | Kinematic Assessment Method & model | Biomechanical Model           |
|----------------|----|-------------------------------------------------------------------------------------------------------------------------------------------------------------------------------------------------------------------------------------------------------------------------------------------|-------------------------------------|-------------------------------|
| Barn (1)       | RA | Peak rearfoot eversion, peak rearfoot plantarflexion, lowest navicular height, peak midfoot inversion, peak forefoot abduction, peak forefoot dorsiflexion                                                                                                                                | 3D analysis                         | Hyslop (2)                    |
| Dubbeldam (2)  | RA | Tibio-talar dorsiflexion, medial arch collapse, hallux dorsiflexion, subtalar eversion, mid-/hindfoot supination, fore-/midfoot supination, leg/hindfoot external rotation, forefoot/ankle abduction metatarsal 1-5 angle, hallux abduction                                               | 3D analysis                         | (Heidelberg) Simon (3)        |
| Turner (4)     | RA | Rearfoot terminal stance plantarflexion, rearfoot midstance eversion, forefoot midstance inversion, forefoot peak abduction, lowest navicular height, peak hallux dorsiflexion                                                                                                            | 3D analysis                         | Carson (5)                    |
| Turner (6)     | RA | Initial foot contact angle, terminal stance heel rise, minimum navicular height in stance, maximum rearfoot eversion in stance,                                                                                                                                                           | 3D analysis                         | Carson (5)                    |
| Turner (7)     | RA | Initial foot contact angle, terminal stance heel rise, minimum arch height, peak eversion                                                                                                                                                                                                 | 3D analysis                         | Carson (5)                    |
| Weiss (8)      | RA | Trunk tilt range, trunk lateral sway range, hip flexion extension range, hip abduction, knee flexion extension range, ankle plantarflexion, ankle dorsiflexion                                                                                                                            | 3D analysis                         | Newington (9)                 |
| Khazzam (10)   | RA | Sagittal, coronal and transverse motion of the hindfoot, forefoot and hallux at load response, midstance, terminal stance, pre-swing, initial swing, mid-swing and terminal swing                                                                                                         | 3D analysis                         | Milwaukee (11)                |
| Laroche (12)   | RA | Range of motion of MTP joints, foot angle at toe-off                                                                                                                                                                                                                                      | 3D analysis                         | Courtine (13) & Borghese (14) |
| Laroche (15)   | RA | Mean articular amplitudes of MTP joints, mean plantar/dorsi flexion ROM of MTP joints                                                                                                                                                                                                     | 3D analysis                         | Courtine (13) & Borghese (14) |
| Woodburn (16)  | RA | Peak dorsiflexion & plantarflexion & ROM, Peak inversion & eversion & ROM, peak adduction, abduction & ROM for the rearfoot & forefoot, minimum & maximum height & displacement of the navicular, peak extension, flexion & ROM of the hallux                                             | 3D analysis                         | Carson (5)                    |
| Turner (17)    | RA | Max ankle joint dorsi/plantarflexion, maximum inversion/eversion, maximum internal/external rotation, range of ankle joint motion in sagittal, frontal and transvers plane, toe off angle, time to maximum eversion motion time integral of sagittal, frontal and transverse ankle motion | Electromagnetic tracking            | N/A                           |
| Woodburn (18)  | RA | Dorsi/plantarflexion, inversion/eversion & internal/external rotation of ankle joint during stance phase of gait                                                                                                                                                                          | Electromagnetic tracking            | N/A                           |
| Woodburn (19)  | RA | Dorsi/plantarflexion, inversion/eversion & internal/external rotation of ankle joint during stance phase of gait                                                                                                                                                                          | Electromagnetic tracking            | N/A                           |
| O'Connell (20) | RA | Ankle motion during stance, mean heel rise during stance phase of gait                                                                                                                                                                                                                    | 3D analysis                         | Siegel (21)                   |

| <b>Author</b> | <b>IA</b> | <b>Parameters measured</b>                                                                                                                               | <b>Kinematic Assessment Method &amp; model</b> | <b>Biomechanical Model</b>   |
|---------------|-----------|----------------------------------------------------------------------------------------------------------------------------------------------------------|------------------------------------------------|------------------------------|
| Siegel (21)   | RA        | Foot to floor contact angle, degree of heel rise at toe off, foot out toe angle, plantar/dorsiflexion/inversion/eversion/abduction/adduction of the foot | 3D analysis                                    | Siegel (21)                  |
| Isacson (22)  | RA        | Hip, knee & ankle joint flexion/extension, abduction/adduction, rotation                                                                                 | Electrogoniometry                              | N/A                          |
| Stauffer (23) | RA        | Standing knee flexion, sagittal, coronal & transverse knee motion, stance phase knee flexion                                                             | Electrogoniometry                              | N/A                          |
| Del Din (24)  | AS        | Flexion/extension, abduction/adduction and internal/external rotation of the trunk, pelvis, hip and ankle. Only flexion/extension reported at the knee   | 3D analysis                                    | Leardini (25) & Sawacha (26) |
| Mangone (27)  | AS        | Pelvis ROM, pelvic tilt, pelvic rotation, shoulder rotation, hip flexion                                                                                 | 3D analysis                                    | Davis (28)                   |
| Zebouni (29)  | AS        | Hip flexion & extension, knee flexion & extension                                                                                                        | Electrogoniometry                              |                              |
| Woodburn (30) | PsA       | Peak ankle/rearfoot dorsiflexion, peak ankle/rearfoot eversion, peak ankle/rearfoot internal rotation, navicular height                                  | 3D analysis                                    | Hyslop (31)                  |

IA = inflammatory arthritis, RA = rheumatoid arthritis, AS = Ankylosing spondylitis, PsA = psoriatic arthritis, ROM = range of motion, 3D = three-dimensional, N/A = not applicable

#### Additional File 4: Reference List

---

1. Barn R, Turner DE, Rafferty D, Sturrock RD, Woodburn J. Tibialis Posterior Tenosynovitis and Associated Pes Plano Valgus in Rheumatoid Arthritis: Electromyography, Multisegment Foot Kinematics, and Ultrasound Features. *Arthritis Care & Res.* 2013;65(4):495-502.
2. Dubbeldam R, Nene AV, Buurke JH, Groothuis-Oudshoorn CGM, Baan H, Drossaers-Bakker KW, et al. Foot and ankle joint kinematics in rheumatoid arthritis cannot only be explained by alteration in walking speed. *Gait Posture.* 2011;33(3):390-5.
3. Simon J, Doederlein L, McIntosh A, Metaxiotis D, Bock H, Wolf S. The Heidelberg foot measurement method: development, description and assessment. *Gait Posture.* 2006;23(4):411-24.
4. Turner D, Woodburn J. Characterising the clinical and biomechanical features of severely deformed feet in rheumatoid arthritis. *Gait Posture.* 2008;28(4):574-80.
5. Carson M, Harrington M, Thompson N, O'connor J, Theologis T. Kinematic analysis of a multi-segment foot model for research and clinical applications: a repeatability analysis. *J Biomech.* 2001;34(10):1299-307.
6. Turner DE, Helliwell PS, Siegel KL, Woodburn J. Biomechanics of the foot in rheumatoid arthritis: Identifying abnormal function and the factors associated with localised disease 'impact'. *Clin Biomech.* 2008;23(1):93-100.
7. Turner DE, Helliwell PS, Emery P, Woodburn J. The impact of rheumatoid arthritis on foot function in the early stages of disease: a clinical case series. *BMC Musculoskelet Disord.* 2006;7:102-8.
8. Weiss RJ, Wretenberg P, Stark A, Palmblad K, Larsson P, Gröndal L, et al. Gait pattern in rheumatoid arthritis. *Gait Posture.* 2008;28(2):229-34.
9. Ounpuu S, Gage J, Davis R. Three-dimensional lower extremity joint kinetics in normal pediatric gait. *J Pediatr Orthop.* 1991;11(3):341.
10. Khazzam M, Long JT, Marks RM, Harris GF. Kinematic changes of the foot and ankle in patients with systemic rheumatoid arthritis and forefoot deformity. *J Orthop Res.* 2007;25(3):319-29.
11. Myers KA, Wang M, Marks RM, Harris GF. Validation of a multisegment foot and ankle kinematic model for pediatric gait. *IEEE Trans Biomed Eng.* 2004;12(1):122-30.
12. Laroche D, Ornetti P, Thomas E, Ballay Y, Maillefert JF, Pozzo T. Kinematic adaptation of locomotor pattern in rheumatoid arthritis patients with forefoot impairment. *Exp Brain Res.* 2007;176(1):85-97.
13. Courtine G, Schieppati M. Human walking along a curved path. I. Body trajectory, segment orientation and the effect of vision. *Eur J Neurosci.* 2003;18(1):177-90.
14. Borghese NA, Bianchi L, Lacquaniti F. Kinematic determinants of human locomotion. *J Physiol.* 1996 August 1, 1996;494(Pt 3):863-79.
15. Laroche D, Pozzo T, Ornetti P, Tavernier C, Maillefert JF. Effects of loss of metatarsophalangeal joint mobility on gait in rheumatoid arthritis patients. *Rheumatology (Oxford).* 2006;45(4):435-40.
16. Woodburn J, Nelson K, Siegel K, Kepple T, Gerber L. Multisegment foot motion during gait: proof of concept in rheumatoid arthritis. *J Rheumatol.* 2004;31(10):1918-27.
17. Turner D, Woodburn J, Helliwell P, Cornwall M, Emery P. Pes planovalgus in RA: a descriptive and analytical study of foot function determined by gait analysis. *Musculoskeletal Care.* 2003;1(1):21-33.
18. Woodburn J, Helliwell P, Barker S. Three-dimensional kinematics at the ankle joint complex in rheumatoid arthritis patients with painful valgus deformity of the rearfoot. *Rheumatology (Oxford).* 2002;41(12):1406-12.
19. Woodburn J, Turner D, Helliwell P, Barker S. A preliminary study determining the feasibility of electromagnetic tracking for kinematics at the ankle joint complex. *Rheumatology (Oxford).* 1999;38(12):1260-8.

20. Minns R, Craxford AD. Pressure Under the Forefoot in Rheumatoid Arthritis A Comparison of Static and Dynamic Methods of Assessment. *Clin Orthop Relat Res.* 1984;187:235.
21. Siegel KL, Kepple TM, O'Connell PG, Gerber LH, Stanhope SJ. A technique to evaluate foot function during the stance phase of gait. *Foot Ankle Int.* 1995;16(12):764-70.
22. Isacson J, Broström LÅ. Gait in rheumatoid arthritis: an electrogoniometric investigation. *J Biomech.* 1988;21(6):451-3, 5-7.
23. Stauffer RN, Chao EY, Györy AN. Biomechanical gait analysis of the diseased knee joint. *Clin Orthop Relat Res.* 1977(126):246-55.
24. Del Din S, Carraro E, Sawacha Z, Guiotto A, Bonaldo L, Masiero S, et al. Impaired gait in ankylosing spondylitis. *Med Biol Eng Comput.* 2011;49(7):801-9.
25. Leardini A, Sawacha Z, Paolini G, Ingrosso S, Nativo R, Benedetti MG. A new anatomically based protocol for gait analysis in children. *Gait Posture.* 2007;26(4):560-71.
26. Sawacha Z, Gabriella G, Cristoferi G, Guiotto A, Avogaro A, Cobelli C. Diabetic gait and posture abnormalities: A biomechanical investigation through three dimensional gait analysis. *Clin Biomech.* 2009;24(9):722-8.
27. Mangone M, Scettri P, Paoloni M, Procaccianti R, Spadaro A, Santilli V. Pelvis-shoulder coordination during level walking in patients with ankylosing spondylitis. *Gait Posture.* 2011;34(1):1-5.
28. Davis RB, Ounpuu S, Tyburski D, Gage JR. A gait analysis data collection and reduction technique. *Hum Mov Sci.* 1991;10(5):575-87.
29. Zebouni L, Helliwell P, Howe A, Wright V. Gait analysis in ankylosing spondylitis. *Ann Rheum Dis.* 1992;51(7):898-9.
30. Woodburn J, Hyslop E, Barn R, McInnes I, Turner D. Achilles tendon biomechanics in psoriatic arthritis patients with ultrasound proven enthesitis. *Scand J Rheumatol.* 2013(00):1-4.
31. Hyslop E, Woodburn J, McInnes I, Semple R, Newcombe L, Hendry G, et al. A reliability study of biomechanical foot function in psoriatic arthritis based on a novel multi-segmented foot model. *Gait Posture.* 2010;32(4):619-26.
