# Supplementary material for: Gait characteristics associated with the foot and ankle in inflammatory arthritis: a systematic review and meta-analysis
Source: Springer Nature journal article supplement (doi:10.1186/s12891-015-0596-0), 2015-06-04
Supplement: MOESM5 [file 9752410]

## Gait characteristics associated with the foot and ankle in inflammatory arthritis: a systematic review and meta-analysis

Matthew Carroll, Priya Parmar, Nicola Dalbeth, Mark Boocock, Keith Rome

---

### Additional File 5: Kinetic gait parameters measured

| Author        | Condition | Parameters measured                                                                                                                        |
|---------------|-----------|--------------------------------------------------------------------------------------------------------------------------------------------|
| Barn (1)      | RA        | Peak ankle power, peak ankle moment                                                                                                        |
| Turner (2)    | RA        | Peak ankle plantarflexion moment, peak ankle power                                                                                         |
| Weiss (3)     | RA        | Joint moments at ankle joint                                                                                                               |
| Turner (4)    | RA        | Ground reaction forces; peak plantarflexion moment, peak ankle joint power                                                                 |
| O'Connell (5) | RA        | Ground reaction forces, mean ankle plantarflexion net muscular moment                                                                      |
| Siegel (6)    | RA        | Muscular moment at ankle joint, ground reaction forces                                                                                     |
| Simkin (7)    | RA        | Peak force on heel, peak force on midfoot, peak force on 1, 2 metatarsal heads, peak force on 3, 4, 5 metatarsal heads, peak force on toes |
| Stauffer (8)  | RA        | Ground reaction forces                                                                                                                     |
| Del Din (9)   | AS        | Flexion-extension, abduction-adduction & internal-external rotation moments at ankle joint                                                 |
| Woodburn (10) | PsA       | Peak ankle joint moment, peak ankle joint power, peak Achilles tendon force                                                                |

RA = rheumatoid arthritis, AS = ankylosing spondylitis, PsA = psoriatic arthritis

## Additional File 5: Reference List

---

1. Barn R, Turner DE, Rafferty D, Sturrock RD, Woodburn J. Tibialis Posterior Tenosynovitis and Associated Pes Plano Valgus in Rheumatoid Arthritis: Electromyography, Multisegment Foot Kinematics, and Ultrasound Features. *Arthritis Care & Res.* 2013;65(4):495-502.
2. Turner DE, Helliwell PS, Siegel KL, Woodburn J. Biomechanics of the foot in rheumatoid arthritis: Identifying abnormal function and the factors associated with localised disease ‘impact’. *Clin Biomech.* 2008;23(1):93-100.
3. Weiss RJ, Wretenberg P, Stark A, Palmblad K, Larsson P, Gröndal L, et al. Gait pattern in rheumatoid arthritis. *Gait Posture.* 2008;28(2):229-34.
4. Turner DE, Helliwell PS, Emery P, Woodburn J. The impact of rheumatoid arthritis on foot function in the early stages of disease: a clinical case series. *BMC Musculoskelet Disord.* 2006;7:102-8.
5. Minns R, Craxford AD. Pressure Under the Forefoot in Rheumatoid Arthritis A Comparison of Static and Dynamic Methods of Assessment. *Clin Orthop Relat Res.* 1984;187:235.
6. Siegel KL, Kepple TM, O’Connell PG, Gerber LH, Stanhope SJ. A technique to evaluate foot function during the stance phase of gait. *Foot Ankle Int.* 1995;16(12):764-70.
7. Simkin A. The dynamic vertical force distribution during level walking under normal and rheumatic feet. *Rheumatol Rehabil.* 1981;20(2):88-97.
8. Stauffer RN, Chao EY, Györy AN. Biomechanical gait analysis of the diseased knee joint. *Clin Orthop Relat Res.* 1977(126):246-55.
9. Del Din S, Carraro E, Sawacha Z, Guiotto A, Bonaldo L, Masiero S, et al. Impaired gait in ankylosing spondylitis. *Med Biol Eng Comput.* 2011;49(7):801-9.
10. Woodburn J, Hyslop E, Barn R, McInnes I, Turner D. Achilles tendon biomechanics in psoriatic arthritis patients with ultrasound proven enthesitis. *Scand J Rheumatol.* 2013(00):1-4.
