# Supplementary material for: Gait characteristics associated with the foot and ankle in inflammatory arthritis: a systematic review and meta-analysis
Source: Springer Nature journal article supplement (doi:10.1186/s12891-015-0596-0), 2015-06-04
Supplement: MOESM6 [file 9752410]

# Gait characteristics associated with the foot and ankle in inflammatory arthritis: a systematic review and meta-analysis

Matthew Carroll, Priya Parmar, Nicola Dalbeth, Mark Boocock, Keith Rome

## Additional File 6: Plantar pressure gait parameters measured and methods of data acquisition

| Author         | Condition | Acquisition system      | Parameters measured                                                                                                                                                    |
|----------------|-----------|-------------------------|------------------------------------------------------------------------------------------------------------------------------------------------------------------------|
| Bowen (1)      | RA        | In shoe pressure system | Peak plantar pressure forefoot                                                                                                                                         |
| Yavuz (2)      | RA        | Custom device           | Peak plantar pressure (1 <sup>st</sup> metatarsal head, hallux, lesser digits); Pressure Time Integral (1 <sup>st</sup> metatarsal head, hallux)                       |
| Schmiegel (3)  | RA        | Plantar pressure plate  | Peak plantar pressure (hindfoot, midfoot, metatarsal 1, 2, 3-5, hallux, 2 <sup>nd</sup> toe, toes 3-5)                                                                 |
| Schmiegel (4)  | RA        | Plantar pressure plate  | Peak plantar pressure (hindfoot, midfoot, metatarsal 1, 2, 3-5, hallux, 2 <sup>nd</sup> toe, toes 3-5)                                                                 |
| Turner (5)     | RA        | Plantar pressure plate  | Centre of pressure at 50% of foot length, lesser toe contact area, midfoot contact area, forefoot peak pressure                                                        |
| Turner (6)     | RA        | Plantar pressure plate  | Centre of pressure at 50% of foot length, lesser toe contact area, midfoot contact area, forefoot peak pressure                                                        |
| Seiple (7)     | RA        | Plantar pressure plate  | Velocity and duration centre of pressure                                                                                                                               |
| Rosenbaum (8)  | RA        | Plantar pressure plate  | Peak plantar pressure (hindfoot, midfoot, metatarsal 1, 2, 3-5, hallux, 2 <sup>nd</sup> toe, toes 3-5)                                                                 |
| Turner (9)     | RA        | Plantar pressure plate  | Centre of pressure at 50% of foot length, lesser toe contact area, midfoot contact area, forefoot peak pressure                                                        |
| Tuna (10)      | RA        | Plantar pressure plate  | Peak plantar pressure (hindfoot, midfoot, forefoot phalanx)                                                                                                            |
| Otter (11)     | RA        | Plantar pressure plate  | Peak plantar pressure (forefoot), force time integral (forefoot)                                                                                                       |
| Turner (12)    | RA        | Plantar pressure plate  | Peak plantar pressure and force, PTI & FTI, total contact area for hindfoot, midfoot forefoot, hallux & digits                                                         |
| O'Connell (13) | RA        | Force plate system      | Centre of pressure at 50% of foot length                                                                                                                               |
| Woodburn (14)  | RA        | In shoe pressure system | Peak plantar pressure (metatarsal heads 1-5)                                                                                                                           |
| Minns (15)     | RA        | Plantar pressure plate  | NR                                                                                                                                                                     |
| Rome (16)      | Gout      | In shoe pressure system | Peak plantar pressure ( hindfoot, midfoot, 1 <sup>st</sup> , 2 <sup>nd</sup> , 3 <sup>rd</sup> , 4 <sup>th</sup> & 5 <sup>th</sup> metatarsal heads, hallux, toes 2-5) |

RA = rheumatoid arthritis, PTI = pressure time integral, FTI = force time integral, NR = not reported

## Additional File 6: Reference List

---

1. Bowen CJ, Culliford D, Allen R, Beacroft J, Gay A, Hooper L, et al. Forefoot pathology in rheumatoid arthritis identified with ultrasound may not localise to areas of highest pressure: cohort observations at baseline and twelve months. *J Foot Ankle Res.* 2011;4(1):25-.
2. Yavuz M, Husni E, Botek G, Davis BL. Plantar Shear Stress Distribution in Patients with Rheumatoid Arthritis Relevance to Foot Pain. *J Am Podiatr Med Assoc.* 2010;100(4):265-9.
3. Schmiegel A, Rosenbaum D, Schorat A, Hilker A, Gaubitz M. Assessment of foot impairment in rheumatoid arthritis patients by dynamic pedobarography. *Gait Posture.* 2008;27(1):110-4.
4. Schmiegel A, Vieth V, Gaubitz M, Rosenbaum D. Pedography and radiographic imaging for the detection of foot deformities in rheumatoid arthritis. *Clin Biomech.* 2008;23(5):648-52.
5. Turner D, Woodburn J. Characterising the clinical and biomechanical features of severely deformed feet in rheumatoid arthritis. *Gait Posture.* 2008;28(4):574-80.
6. Turner DE, Helliwell PS, Siegel KL, Woodburn J. Biomechanics of the foot in rheumatoid arthritis: Identifying abnormal function and the factors associated with localised disease 'impact'. *Clin Biomech.* 2008;23(1):93-100.
7. Semple R, Turner DE, Helliwell PS, Woodburn J. Regionalised centre of pressure analysis in patients with rheumatoid arthritis. *Clin Biomech.* 2007;22(1):127-9.
8. Rosenbaum D, Schmiegel A, Meermeier M, Gaubitz M. Plantar sensitivity, foot loading and walking pain in rheumatoid arthritis. *Rheumatology (Oxford).* 2006;45(2):212-4.
9. Turner DE, Helliwell PS, Emery P, Woodburn J. The impact of rheumatoid arthritis on foot function in the early stages of disease: a clinical case series. *BMC Musculoskelet Disord.* 2006;7:102-8.
10. Tuna H, Birtane M, Taştekin N, Kokino S. Pedobarography and its relation to radiologic erosion scores in rheumatoid arthritis. *Rheumatol Int.* 2005;26(1):42-7.
11. Otter SJ, Bowen CJ, Young AK. Forefoot plantar pressures in rheumatoid arthritis. *J Am Podiatr Med Assoc.* 2004;94(3):255-60.
12. Turner D, Woodburn J, Helliwell P, Cornwall M, Emery P. Pes planovalgus in RA: a descriptive and analytical study of foot function determined by gait analysis. *Musculoskeletal Care.* 2003;1(1):21-33.
13. O'Connell PG, Lohmann Siegel K, Kepple TM, Stanhope SJ, Gerber LH. Forefoot deformity, pain, and mobility in rheumatoid and nonarthritic subjects. *J Rheumatol.* 1998;25(9):1681-6.
14. Woodburn J, Helliwell PS. Relation between heel position and the distribution of forefoot plantar pressures and skin callosities in rheumatoid arthritis. *Ann Rheum Dis.* 1996;55(11):806-10.
15. Minns R, Craxford AD. Pressure Under the Forefoot in Rheumatoid Arthritis A Comparison of Static and Dynamic Methods of Assessment. *Clin Orthop Relat Res.* 1984;187:235.
16. Rome K, Survepalli D, Sanders A, Lobo M, McQueen F, McNair P, et al. Functional and biomechanical characteristics of foot disease in chronic gout: A case-control study. *Clin Biomech.* 2011;26(1):90-4.
